# Supplementary material for: Genomic analysis of an emerging multiresistant Staphylococcus aureus strain rapidly spreading in cystic fibrosis patients revealed the presence of an antibiotic inducible bacteriophage
Source: PubMed Central journal article supplement (PMC2629466; doi:10.1186/1745-6150-4-1), 2009-01-13

Figure S1

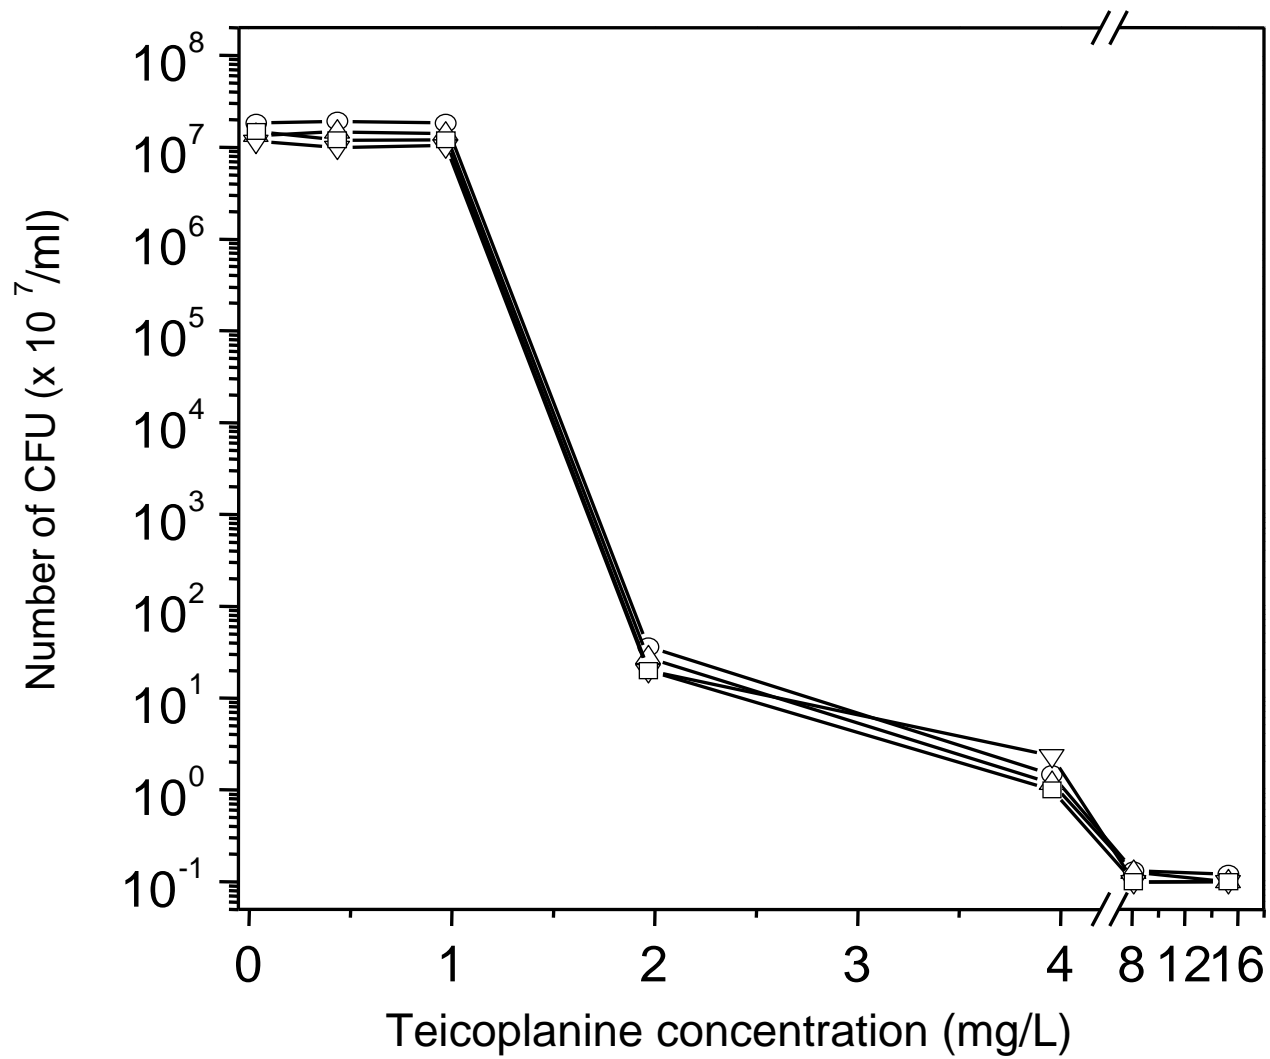

Supplement: 1745-6150-4-1-S1.pdf [file 1745-6150-4-1-S1.pdf]
