# Supplementary material for: Genomic analysis of an emerging multiresistant Staphylococcus aureus strain rapidly spreading in cystic fibrosis patients revealed the presence of an antibiotic inducible bacteriophage
Source: PubMed Central journal article supplement (PMC2629466; doi:10.1186/1745-6150-4-1), 2009-01-13
Supplement: 1745-6150-4-1-S2.pdf [file 1745-6150-4-1-S2.pdf]

Table S1. List of genes down- and up-regulated in CF-Marseille as compared to other available genomes.

| <b>Function</b>                                     | <b>Fold change<br/>(CF-Marseille/All other)</b> | <b>Short name</b> |
|-----------------------------------------------------|-------------------------------------------------|-------------------|
| <b>phage DnaC-like protein</b>                      | 0,0345                                          | SAOUHSC_02216     |
| <b>CadC</b>                                         | 0,0411                                          | cadC              |
| <b>CadX</b>                                         | 0,0411                                          | cadX              |
| <b>Hypothetical protein</b>                         | 0,114                                           | SAVP033           |
| <b>Hypothetical protein</b>                         | 0,125                                           | SAOUHSC_01957     |
| <b>hypothetical protein (pseudogene)</b>            | 0,125                                           | SAS1751           |
| <b>epidermin immunity protein F</b>                 | 0,137                                           | epiG              |
| <b>Hypothetical protein</b>                         | 0,137                                           | SAOUHSC_01945     |
| <b>putative lantibiotic ABC transporter protein</b> | 0,137                                           | SAS1739           |
| <b>Hypothetical protein</b>                         | 0,235                                           | SAS1909           |
| <b>phi PVL orf 39-like protein</b>                  | 0,235                                           | SAV1988           |
| <b>Hypothetical protein</b>                         | 0,268                                           | SAOUHSC_02215     |
| <b>Hypothetical protein</b>                         | 0,344                                           | SA0956            |

|                                                                                |       |               |
|--------------------------------------------------------------------------------|-------|---------------|
| <b>putative manganese transport protein</b>                                    | 0,344 | SAR1079       |
| <b>Mn<sup>2+</sup>/Fe<sup>2+</sup> transporter, NRAMP family</b>               | 0,344 | SACOL1114     |
| <b>Hypothetical protein</b>                                                    | 0,347 | SA1793        |
| <b>CadD</b>                                                                    | 0,404 | cadD          |
| <b>Hypothetical protein</b>                                                    | 0,416 | SAV0866       |
| <b>Hypothetical protein</b>                                                    | 0,422 | SAR1528       |
| <b>Hypothetical protein</b>                                                    | 2,067 | SAS0937       |
| <b>capsular polysaccharide synthesis enzyme Cap5D</b>                          | 2,129 | cap5D         |
| <b>potential ATP-binding protein</b>                                           | 2,135 | pSAS14        |
| <b>recombinase Sin</b>                                                         | 2,135 | sin           |
| <b>bacteriophage L54a, deoxyuridine 5-triphosphate<br/>nucleotidohydrolase</b> | 2,162 | SAOUHSC_01552 |
| <b>prophage L54a, deoxyuridine 5'-triphosphate<br/>nucleotidohydrolase</b>     | 2,162 | dut           |
| <b>putative dUTP pyrophosphatase</b>                                           | 2,162 | SAR2072       |
| <b>Hypothetical protein</b>                                                    | 2,247 | SAR1515       |

|                                                       |        |               |
|-------------------------------------------------------|--------|---------------|
| <b>phiSLT ORF104a-like protein, repressor</b>         | 2,247  | SAUSA300_1434 |
| <b>putative phage regulatory protein</b>              | 2,247  | SAS0897       |
| <b>arsenic efflux pump protein</b>                    | 2,357  | arsB          |
| <b>phiSLT ORF92-like protein, uncharacterized</b>     |        |               |
| <b>phage protein (possible DNA packaging)</b>         | 2,4745 | SAUSA300_1400 |
| <b>prophage L54a, DNA packaging protein, putative</b> | 2,4745 | SACOL0371     |
| <b>putative regulatory protein</b>                    | 2,515  | SAR1555       |
| <b>Hypothetical protein</b>                           | 2,548  | SAS0901       |
| <b>phiSLT ORF71-like protein</b>                      | 2,548  | SAUSA300_1431 |
| <b>Hypothetical protein</b>                           | 2,552  | MW0744        |
| <b>Hypothetical protein</b>                           | 2,649  | SAS0939       |
| <b>Hypothetical protein</b>                           | 2,702  | MW1397        |
| <b>capsular polysaccharide synthesis enzyme Cap5E</b> | 2,703  | capE          |
| <b>Hypothetical protein</b>                           | 2,817  | SAR1512       |
| <b>arsenate reductase</b>                             | 2,821  | arsC          |
| <b>Immunoglobulin G binding protein A precursor</b>   | 3,193  | SAOUHSC_00069 |

|                                                                          |        |               |
|--------------------------------------------------------------------------|--------|---------------|
| <b>major tail protein</b>                                                | 3,213  | SAOUHSC_01529 |
| <b>phiSLT ORF213-like protein, major tail protein</b>                    | 3,213  | SAUSA300_1397 |
| <b>prophage L54a, major tail protein, putative</b>                       | 3,213  | SACOL0375     |
| <b>phiSLT orf 110-like protein</b>                                       | 3,2995 | SAOUHSC_01532 |
| <b>phiSLT ORF110-like protein</b>                                        | 3,2995 | SAUSA300_1399 |
| <b>Hypothetical protein</b>                                              | 3,491  | SAR1514       |
| <b>putative surface anchored protein</b>                                 | 3,508  | SAS0520       |
| <b>Ser-Asp rich fibrinogen-binding bone sialoprotein-binding protein</b> | 3,508  | sdrD          |
| <b>Hypothetical protein</b>                                              | 3,567  | SAUSA300_0915 |
| <b>ABC transporter ATP-binding protein</b>                               | 3,623  | SACOL1352     |
| <b>Hypothetical protein</b>                                              | 3,623  | MW1206        |
| <b>Hypothetical protein</b>                                              | 3,675  | SAS0917       |
| <b>Hypothetical protein</b>                                              | 4,532  | SACOL0372     |
| <b>Hypothetical protein</b>                                              | 4,855  | SAS0896       |
| <b>pathogenicity island protein</b>                                      | 4,855  | SACOL0889     |

|                                                                                                      |       |                     |
|------------------------------------------------------------------------------------------------------|-------|---------------------|
| <b>Replication and maintenance protein</b>                                                           | 4,857 | SAUSA300_pUSA030006 |
| <b>Hypothetical protein</b>                                                                          | 4,976 | SAUSA300_0042       |
| <b>Hypothetical protein</b>                                                                          | 5,442 | SAV2199             |
| <b>serine protease</b>                                                                               | 5,621 | splA                |
| <b>phi PVL orf 52-like protein</b>                                                                   | 5,926 | SAOUHSC_01556       |
| <b>Hypothetical protein</b>                                                                          | 9,655 | MW1412              |
| <b>Hypothetical protein</b>                                                                          | 11,01 | SAUSA300_pUSA030029 |
| <b>Hypothetical protein</b>                                                                          | 13,11 | MW0042              |
| <b>Hypothetical protein</b>                                                                          | 17,73 | SAUSA300_0046       |
| <b>phiSLT ORF204-like protein</b>                                                                    | 37,64 | SAUSA300_1437       |
| <b>Hypothetical protein</b>                                                                          | 49,92 | MW0043              |
| <b>rRNA adenine N-6-methyltransferase (Macrolide-lincosamide-streptogramin B resistance protein)</b> | 129,6 | ermC                |
