# Supplementary material for: Genomic analysis of an emerging multiresistant Staphylococcus aureus strain rapidly spreading in cystic fibrosis patients revealed the presence of an antibiotic inducible bacteriophage
Source: PubMed Central journal article supplement (PMC2629466; doi:10.1186/1745-6150-4-1), 2009-01-13
Supplement: 1745-6150-4-1-S3.pdf [file 1745-6150-4-1-S3.pdf]

**Table S2.** Patient information and typing of the strains

Study n°: number attributed to the strain in this study. R, resistant; S, sensitive. MecA: detection of the *mecA* gene. SCC Mec: type of the SCCmec cassette; SCND, cassette type not determined (i.e. not 1, 2 or 4). AGR: *agr* type. PVL, TSST-1, EXFO-A, EXFO-B: detection of the gene coding for the toxin.

| N°  | CF  | Methicillin | MecA       | SCC Mec | AGR | Phage | PVL | TSST -1 | EXFO A | EXFO B |
|-----|-----|-------------|------------|---------|-----|-------|-----|---------|--------|--------|
| M1  | No  | R           | <b>Pos</b> | 4       | 1   |       | Neg | Neg     | Neg    | Neg    |
| M2  | No  | R           | <b>Pos</b> | Neg     | 1   | +     | Neg | Neg     | Neg    | Neg    |
| M3  | No  | R           | <b>Pos</b> | SCND    | 2   |       | Neg | Neg     | Neg    | Neg    |
| M4  | No  | R           | Neg        | Neg     | 1   |       | Neg | Neg     | Neg    | Neg    |
| M5  | No  | R           | <b>Pos</b> | 4       | 1   | +     | Neg | Neg     | Neg    | Neg    |
| M6  | No  | R           | <b>Pos</b> | 4       | 1   |       | Neg | Neg     | Neg    | Neg    |
| M7  | No  | R           | <b>Pos</b> | 4       | 1   | +     | Neg | Neg     | Neg    | Neg    |
| M8  | No  | R           | <b>Pos</b> | 4       | 1   |       | Neg | Neg     | Neg    | Neg    |
| M9  | No  | R           | <b>Pos</b> | SCND    | 2   |       | Neg | Neg     | Neg    | Neg    |
| M10 | No  | R           | Neg        | Neg     | 2   |       | Neg | Neg     | Neg    | Neg    |
| M11 | Yes | S           | Neg        | Neg     | 2   |       | Neg | Neg     | Neg    | Neg    |
| M12 | Yes | S           | Neg        | Neg     | 2   |       | Neg | Neg     | Neg    | Neg    |
| M13 | Yes | R           | <b>Pos</b> | 4       | 1   | +     | Neg | Neg     | Neg    | Neg    |
| M14 | Yes | R           | <b>Pos</b> | 4       | 1   |       | Neg | Neg     | Neg    | Neg    |
| M15 | Yes | R           | <b>Pos</b> | 4       | 1   | +     | Neg | Neg     | Neg    | Neg    |
| M16 | Yes | R           | <b>Pos</b> | 4       | 1   |       | Neg | Neg     | Neg    | Neg    |
| M17 | Yes | R           | <b>Pos</b> | 4       | 1   | +     | Neg | Neg     | Neg    | Neg    |
| M18 | Yes | R           | <b>Pos</b> | 4       | 2   | +     | Neg | Neg     | Neg    | Neg    |

|                  |     |   |            |     |   |   |     |            |     |     |
|------------------|-----|---|------------|-----|---|---|-----|------------|-----|-----|
| M19              | Yes | R | <b>Pos</b> | 4   | 1 | + | Neg | Neg        | Neg | Neg |
| M20              | Yes | R | <b>Pos</b> | 4   | 1 |   | Neg | Neg        | Neg | Neg |
| M21              | Yes | S | Neg        | Neg | 3 |   | Neg | <b>Pos</b> | Neg | Neg |
| M22              | Yes | R | <b>Pos</b> | 4   | 1 | + | Neg | Neg        | Neg | Neg |
| M23              | Yes | S | Neg        | Neg | 2 |   | Neg | Neg        | Neg | Neg |
| M24              | Yes | S | Neg        | Neg | 3 |   | Neg | Neg        | Neg | Neg |
| M25              | Yes | S | Neg        | Neg | 3 |   | Neg | <b>Pos</b> | Neg | Neg |
| M26              | Yes | R | <b>Pos</b> | 4   | 1 |   | Neg | Neg        | Neg | Neg |
| M27              | Yes | R | <b>Pos</b> | 1   | 1 |   | Neg | Neg        | Neg | Neg |
| M28              | Yes | R | <b>Pos</b> | 2   | 2 | + | Neg | Neg        | Neg | Neg |
| M29              | Yes | R | <b>Pos</b> | 4   | 1 | + | Neg | Neg        | Neg | Neg |
| M30              | Yes | R | <b>Pos</b> | 1   | 2 |   | Neg | <b>Pos</b> | Neg | Neg |
| CF-<br>Marseille | Yes | R | <b>Pos</b> | 4   | 2 | + | Neg | Neg        | Neg | Neg |
| M32              | Yes | R | <b>Pos</b> | 4   | 2 | + | Neg | Neg        | Neg | Neg |
| M33              | Yes | R | <b>Pos</b> | 4   | 1 | + | Neg | Neg        | Neg | Neg |
| M34              | Yes | R | <b>Pos</b> | 4   | 1 | + | Neg | Neg        | Neg | Neg |
| M35              | Yes | S | Neg        | Neg | 3 |   | Neg | <b>Pos</b> | Neg | Neg |
| M36              | Yes | S | Neg        | Neg | 3 |   | Neg | <b>Pos</b> | Neg | Neg |
| M37              | Yes | S | Neg        | Neg | 2 |   | Neg | Neg        | Neg | Neg |
| M38              | Yes | R | <b>Pos</b> | 4   | 1 | + | Neg | Neg        | Neg | Neg |
| M39              | Yes | R | <b>Pos</b> | 4   | 1 | + | Neg | Neg        | Neg | Neg |
| M40              | Yes | R | <b>Pos</b> | 4   | 1 |   | Neg | Neg        | Neg | Neg |
